# Supplementary material
Source: PubMed Central journal article supplement (PMC7432282)
Supplement: jamainternmed-e203134-s001.pdf [file jamainternmed-e203134-s001.pdf]

## RESEARCH PROTOCOL

Morphine for palliative treatment of refractory dyspnea in patients with advanced COPD: benefits and respiratory adverse effects (MORDYC)

Amendments to the original study protocol are shown in **bold blue**.

|                                              |                                                                                                                                                                                                                                                                                                                                                                                                                                                                                                                                                                                                                                                                                                                                                                                                                                                             |
|----------------------------------------------|-------------------------------------------------------------------------------------------------------------------------------------------------------------------------------------------------------------------------------------------------------------------------------------------------------------------------------------------------------------------------------------------------------------------------------------------------------------------------------------------------------------------------------------------------------------------------------------------------------------------------------------------------------------------------------------------------------------------------------------------------------------------------------------------------------------------------------------------------------------|
| Coordinating investigator/<br>project leader | Dr. D.J.A. Janssen, MD PhD<br>Centre of expertise for Palliative Care, Maastricht UMC+<br>CIRO, Centre of Expertise for chronic organ failure                                                                                                                                                                                                                                                                                                                                                                                                                                                                                                                                                                                                                                                                                                               |
| Principal investigator(s)                    | Dr. D.J.A. Janssen, MD PhD<br>Centre of expertise for Palliative Care, Maastricht UMC+<br>CIRO, Centre of Expertise for chronic organ failure<br><br>Prof. E.F.M. Wouters, MD PhD<br>Department of Respiratory Medicine, Maastricht UMC+<br>CIRO, Centre of Expertise for chronic organ failure                                                                                                                                                                                                                                                                                                                                                                                                                                                                                                                                                             |
| Project team                                 | Mw. C.A. van den Berg-Verberkt, MSc<br>Department of Health Services Research, Maastricht University<br>Prof. M.H.J. van den Beuken-van Everdingen, MD PhD<br>Centre of expertise for Palliative Care, Maastricht UMC+<br>Dr. F.M.E. Franssen, MD PhD<br>Department of Respiratory Medicine, Maastricht UMC+<br>CIRO, Centre of Expertise for chronic organ failure<br>Dr. A. Courtens, PhD<br>Centre of expertise for Palliative Care, Maastricht UMC+<br>Prof. C.D. Dirksen, PhD<br>Department of Clinical Epidemiology and Medical Technology<br>Assessment, Maastricht University<br>Prof. J.M.G.A. Schols, MD PhD<br>Department of Health Services Research, Maastricht University<br>Prof. Meek, PhD<br>University of Colorado at Denver and Health Sciences Center<br>Mrs. Y. Meertens-Kerris<br>CIRO, Centre of Expertise for chronic organ failure |
| Sponsor                                      | CAPHRI School for Public Health and Primary Care, Faculty of Health,<br>Medicine and Life Sciences, Maastricht University<br>Maastricht, The Netherlands                                                                                                                                                                                                                                                                                                                                                                                                                                                                                                                                                                                                                                                                                                    |
| Subsidising party                            | ZonMw                                                                                                                                                                                                                                                                                                                                                                                                                                                                                                                                                                                                                                                                                                                                                                                                                                                       |

## 10 Table of contents

|    |                                                                               |    |
|----|-------------------------------------------------------------------------------|----|
| 11 | 1. Summary .....                                                              | 4  |
| 12 | 2. Introduction and rationale .....                                           | 5  |
| 13 | 3. Objectives .....                                                           | 7  |
| 14 | 4. Study design.....                                                          | 8  |
| 15 | 5. Study population .....                                                     | 9  |
| 16 | 5.1 Population (base).....                                                    | 9  |
| 17 | 5.2 Inclusion criteria.....                                                   | 9  |
| 18 | 5.3 Exclusion criteria .....                                                  | 9  |
| 19 | 5.4 Sample size calculation .....                                             | 9  |
| 20 | 6. Treatment of subjects.....                                                 | 10 |
| 21 | 6.1 Investigational product/treatment.....                                    | 10 |
| 22 | 6.2 Use of co-intervention (if applicable) .....                              | 10 |
| 23 | 7. Investigational product.....                                               | 11 |
| 24 | 7.1 Name and description of investigational product(s).....                   | 11 |
| 25 | 7.2 Summary of findings from clinical studies .....                           | 11 |
| 26 | 7.3 Summary of known and potential risks and benefits.....                    | 11 |
| 27 | 7.4 Description and justification of route of administration and dosage.....  | 11 |
| 28 | 7.5 Dosages, dosage modifications and method of administration .....          | 11 |
| 29 | 7.6 Preparation and labelling of Investigational Medicinal Product .....      | 12 |
| 30 | 7.7 Drug accountability .....                                                 | 12 |
| 31 | 8. Non-investigational product.....                                           | 13 |
| 32 | 8.1 Name and description of non-investigational product(s) .....              | 13 |
| 33 | 8.2 Description and justification of route of administration and dosage ..... | 13 |
| 34 | 8.3 Dosages, dosage modifications and method of administration .....          | 13 |
| 35 | 8.4 Drug accountability .....                                                 | 13 |
| 36 | 9. Methods .....                                                              | 14 |
| 37 | 9.1 Study parameters/endpoints .....                                          | 14 |
| 38 | 9.1.1 Main study parameter/endpoint .....                                     | 14 |
| 39 | 9.1.2 Secondary study parameters/endpoints .....                              | 14 |
| 40 | 9.1.3 Other study parameters.....                                             | 14 |
| 41 | 9.2 Randomisation, blinding and treatment allocation .....                    | 14 |
| 42 | 9.3 Study procedures.....                                                     | 14 |
| 43 | 9.4 Withdrawal of individual subjects.....                                    | 15 |
| 44 | 9.4.1 Specific criteria for withdrawal .....                                  | 16 |
| 45 | 9.5 Replacement of individual subjects after withdrawal.....                  | 16 |
| 46 | 9.6 Follow-up of subjects withdrawn from treatment .....                      | 16 |
| 47 | 9.7 Premature termination of the study .....                                  | 16 |
| 48 | 10. Safety reporting .....                                                    | 17 |
| 49 | 10.1 Temporary halt for reasons of subject safety .....                       | 17 |
| 50 | 10.2 AEs, SAEs and SUSARs.....                                                | 17 |
| 51 | 10.2.1 Adverse events (AEs).....                                              | 17 |
| 52 | 10.2.2 Serious adverse events (SAEs).....                                     | 17 |
| 53 | 10.2.3 Suspected unexpected serious adverse reactions (SUSARs).....           | 17 |
| 54 | 10.3 Annual safety report.....                                                | 18 |
| 55 | 10.4 Follow-up of adverse events .....                                        | 18 |
| 56 | 11. Statistical analysis .....                                                | 19 |
| 57 | 11.1 Primary study parameter(s) .....                                         | 19 |
| 58 | 11.2 Secondary study parameters.....                                          | 19 |
| 59 | 11.3 Interim analysis .....                                                   | 20 |
| 60 | 12. Ethical considerations.....                                               | 21 |
| 61 | 12.1 Regulation statement.....                                                | 21 |
| 62 | 12.2 Recruitment and consent .....                                            | 21 |
| 63 | 12.3 Benefits and risks assessment, group relatedness.....                    | 21 |
| 64 | 12.4 Compensation for injury .....                                            | 21 |
| 65 | 12.5 Incentives .....                                                         | 22 |
| 66 | 13. Administrative aspects, monitoring and publication .....                  | 23 |
| 67 | 13.1 Handling and storage of data and documents.....                          | 23 |
| 68 | 13.2 Monitoring and Quality Assurance .....                                   | 23 |

69 13.3 Amendments ..... 23  
70 13.4 Annual progress report..... 23  
71 13.5 Temporary halt and (prematurely) end of study report ..... 23  
72 13.6 Public disclosure and publication policy..... 23  
73 14. Structured risk analysis..... 24  
74 14.1 Synthesis ..... 24  
75 15. References ..... 25  
76  
77

## 1. Summary

78  
79  
80 **Rationale:** Dyspnea is the most reported symptom of patients with advanced Chronic Obstructive Pulmonary  
81 Disease (COPD) and is undertreated. Morphine is an effective treatment for dyspnea and is recommended in  
82 clinical practice guidelines, but questions concerning benefits and concerns about respiratory adverse effects  
83 remain. For example, the effect on health-related quality of life and functional capacity is unknown. In one-third  
84 of the patients oral sustained release morphine (morphine SR) doesn't relieve dyspnea and it remains unknown  
85 whether severity and descriptors of breathlessness may predict a response to morphine. Finally, cost-  
86 effectiveness of morphine SR in this patient group is unknown. Therefore, prescription of morphine to patients  
87 with COPD is limited.

88 **Objectives** of this randomized controlled trial are 1.1) to study the effect of oral administration of morphine SR  
89 on health-related quality of life; and 1.2) to explore whether morphine SR leads to respiratory adverse effects in  
90 patients with advanced COPD. Secondary objectives are 2.1) to study the effect on functional capacity; 2.2) to  
91 explore whether description and severity of breathlessness are related with a clinically relevant response to  
92 morphine and 2.3) to analyse the cost-effectiveness of morphine SR in patients with advanced COPD.

93 **Study design:** double-blind randomized placebo controlled intervention study.

94 **Study population:** 124 clinically stable outpatients with COPD and severe dyspnea despite optimal treatment.

95 **Intervention:** patients will be randomized to an intervention group receiving morphine SR or a control group  
96 receiving placebo.

97 **Main study parameters/endpoints:** Health-related quality of life, respiratory parameters, functional capacity  
98 and changes in these outcomes will be compared between the intervention and the control group. The  
99 relationship between response to morphine and severity of dyspnea and descriptors of breathlessness will be  
100 explored. Finally, a trial-based economic evaluation from the societal and healthcare perspective **and a model-**  
101 **based economic evaluation will be performed.**

102 **Nature and extent of the burden and risks associated with participation, benefit and group relatedness:**  
103 Participants will be asked to complete a baseline and outcome-assessment (two site visits between 2 and 3  
104 hours); diary cards (four weeks); two home visits (1 hour each) and two phone calls (0.5 hour each) within four  
105 weeks. They will be asked to complete questionnaires and perform a Timed 'Up & Go' test. Two arterial blood  
106 gases will be drawn. Lung function will be measured. Also, overnight oximetry will be performed twice at their  
107 own homes. **Finally, questionnaires will be sent to the participants four, eight and twelve weeks after the**  
108 **completion of the intervention period.** Patients may experience adverse effects of morphine like nausea,  
109 constipation, and drowsiness. Adverse effects will be monitored closely and will be minimized because the  
110 maximum dosage of morphine will be 30mg per day. Patients will receive laxatives to prevent constipation and  
111 anti-emetics to prevent nausea.  
112

## 2. Introduction and rationale

Nowadays, the need for palliative care for patients with Chronic Obstructive Pulmonary Disease (COPD) has been recognized.<sup>1,2</sup> Cornerstone of palliative care is optimal symptom management.<sup>3</sup> Dyspnea is the most frequently reported symptom of patients with advanced COPD with 94% reporting moderate to severe dyspnea and most patients reporting insufficient treatment.<sup>4</sup> Current national and international statements recommend the use of opioids to treat severe dyspnea in patients with COPD.<sup>1,5-9</sup> Previous authors<sup>10</sup> proposed a dyspnea ladder in COPD and stated that patients with severe dyspnea despite optimal pharmacological and non-pharmacological treatment (including pulmonary rehabilitation) should receive palliative pharmacological treatment with for example morphine. Two meta-analyses showed that opioids may relieve dyspnea in several populations of patients with life-limiting illness.<sup>11,12</sup> Furthermore, two studies were performed using sustained release morphine (morphine SR) and these studies confirmed that morphine can relieve severe dyspnea in patients with life-limiting diseases, including COPD.<sup>13,14</sup> Despite the recommendations in practice guidelines<sup>1,5,6</sup>, only 2% of the Dutch clinically stable outpatients with advanced COPD is using opioids.<sup>4</sup> A recent survey of the Dutch Association for Chest physicians and Tuberculosis (NVALT) among Dutch chest physicians showed that physicians experience several barriers towards the prescription of opioids.<sup>15</sup> In addition, two international qualitative studies showed barriers among physicians towards the prescription of opioids in patients with COPD.<sup>16,17</sup> Most important barriers are uncertainty about positive effects, fear for respiratory adverse effects and lack of evidence-based guidelines. The current literature is insufficient to overcome these barriers. Therefore, scientific background for the current guidelines is limited.

While morphine can relieve dyspnea among patients with advanced COPD, the effect on health-related quality of life remains unknown. Abernethy et al.<sup>13</sup> found no effect on wellbeing, while Poole et al.<sup>18</sup> suggested that morphine SR may even impair health-related quality of life in COPD. A recent systematic review concerning opioid treatment for dyspnea concluded that a meta-analysis of HRQL could not be performed due to study heterogeneity and insufficient data.<sup>12</sup> The aim of interventions in palliative care is to improve quality of life.<sup>3</sup> Therefore, it is of major importance to explore whether and to what extent the use of morphine can influence health-related quality of life. Further, the effect of opioids on exercise capacity remains unknown. In fact, two meta-analyses<sup>11,12</sup> found no effect on exercise tolerance, mainly due to the administration of small and single doses<sup>19</sup>, while a randomized, double-blind study<sup>20</sup> suggested a positive effect of fentanyl on exercise capacity in patients with COPD.

Another reported barrier is fear for respiratory adverse effects.<sup>10,16,17</sup> Previous studies were not designed to assess safety.<sup>13,14,21</sup> The American College of Chest Physicians consensus statement on the management of dyspnea in patients with advanced lung or heart disease describes that there is no evidence for significant adverse respiratory effects.<sup>6</sup> A review of studies in cancer patients showed no relevant respiratory adverse effects.<sup>22</sup> Data concerning adverse respiratory effects in patients with COPD are limited and results are conflicting. Abernethy et al.<sup>13</sup> found similar respiratory rates for 18 patients (majority with COPD) receiving morphine and 20 patients receiving placebo. However, they did not assess carbon dioxide levels. A randomized study in 14 COPD patients showed that 2.5-7.5mg of diamorphine had no significant effect on dyspnea or blood gases.<sup>23</sup> Poole and colleagues found no change in oxygen saturation of 14 COPD patients during a six-week treatment with sustained-release morphine.<sup>18</sup> On the other hand, the use of higher dosages of oral morphine during exercise testing caused higher carbon dioxide levels and lower oxygen levels in a study including 13 normocapnic COPD patients.<sup>24</sup> A case report showed severe respiratory depression in a COPD patient using transdermal fentanyl.<sup>25</sup> A recent population-based prospective cohort study showed that lower dose opioids ( $\leq 30$  mg oral morphine equivalents a day) were not associated with increased mortality, while a higher dose opioids was associated with increased mortality. Unfortunately, respiratory adverse effects were not investigated in this study.<sup>26</sup> Therefore, to date remains unknown whether and to what extent morphine leads to respiratory adverse effects in patients with COPD.

Finally, in about one-third of the patients oral morphine SR does not relieve dyspnea<sup>14</sup>, and the current literature is conflicting concerning whether severity and description of dyspnea are related with response.<sup>19,21,27</sup> This knowledge is necessary to select the patients, which are likely to respond to morphine. The recent published 'American Thoracic Society statement: update on the mechanisms, assessment, and management of dyspnea' described three sensory descriptors of dyspnea which may be linked by specific physiological processes: sensations of work or effort, tightness, and air hunger/unsatisfied inspiration.<sup>28</sup> We hypothesize that a response to opioids is related with these descriptions of breathlessness because of differences in the underlying physiological processes. In fact, a pooled analysis showed weak evidence for a relationship between response to opioids and the description 'cannot get enough air'.<sup>27</sup> Laboratory models in healthy persons showed that opioids reduced dyspnea in air hunger<sup>29</sup>, but not in sensations of work or effort.<sup>30</sup>

173  
174  
175  
176  
177  
178  
179  
180

To conclude, morphine is an effective treatment for dyspnea and is recommended in current guidelines, but questions concerning benefits and concerns about respiratory adverse effects remain. Indeed, the effect on health-related quality of life and functional capacity remains unknown. Moreover, in one-third of the patients oral sustained release morphine (morphine SR) does not relieve dyspnea and to date remains unknown whether severity of dyspnea and descriptors of breathlessness may predict a response to morphine. Finally, its cost-effectiveness is unknown.

181 **3. Objectives**

182

183 **Primary objectives:**

184 1.1) to study whether and to what extent oral administration of morphine SR improves health-related quality of  
185 life among patients with advanced COPD;

186 1.2) to explore whether and to what extent oral administration of morphine SR leads to adverse respiratory  
187 effects in patients with advanced COPD.

188

189 **Secondary objectives:**

190 2.1) to study whether and to what extent oral administration of morphine SR improves exercise capacity among  
191 patients with advanced COPD;

192 2.2) to study the relationship between severity and description of breathlessness and response to morphine SR  
193 among patients with advanced COPD;

194 2.3) to analyse the cost-effectives of oral administration of morphine SR in patients with advanced COPD.

195

196 We hypothesize a priori that:

197 1.1) morphine SR improves health-related quality of life among patients with advanced COPD;

198 1.2) morphine SR does not lead to adverse respiratory effects in patients with advanced COPD.

199 2.1) morphine SR improves exercise capacity among patients with advanced COPD;

200 2.2) descriptors of breathlessness (sensations of work or effort, tightness, and air hunger/unsatisfied inspiration)  
201 and severity of breathlessness are determinants of the response to morphine SR among patients with advanced  
202 COPD;

203 2.3) morphine SR for dyspnea in patients with COPD is cost-effective.

204

205

#### 206 4. Study design

207

208 A double blind randomized placebo-controlled trial will be designed.

209

210 *Participants* will be outpatients with a confirmed diagnosis of COPD, who suffer from severe dyspnea despite  
 211 optimal pharmacological and non-pharmacological treatment. Participants will be recruited at CIRO, a centre for  
 212 pulmonary rehabilitation in Horn, the Netherlands after they completed a pulmonary rehabilitation program  
 213 **within the last 2 years. Furthermore, participants will be recruited at the Zuyderland hospital in Heerlen,**  
 214 **the Netherlands, and at VieCuri hospital in Venlo, the Netherlands, both after completion of a pulmonary**  
 215 **rehabilitation program within the last 2 years.**

216

217 *Intervention:* After review of eligibility and consent, participants will be randomly allocated to a treatment  
 218 group or control group. Allocation will be concealed. Patients in the intervention group will receive regular  
 219 clinical care and morphine SR 10mg, administered twice daily (20mg/24h), which can be increased after one or  
 220 two weeks to three times per day 10mg (30mg/24h) in non-responders. Patients will be defined as non-  
 221 responders if the mean dyspnea numeric rating scale (NRS) score was not reduced by 1 point in comparison  
 222 with baseline.<sup>31</sup> The control group will receive regular clinical care and placebo medication. Patients will  
 223 receive morphine or placebo for four weeks. In addition, both groups will receive laxatives at the start of the  
 224 intervention and will be instructed to adjust the dose as needed. Finally, patients will receive a prescription for  
 225 metoclopramide and will be instructed to use these as needed.

226

227 A treatment period of four weeks will be sufficient to show results of treatment with morphine on dyspnea.  
 228 Indeed, a previous study showed effect of morphine after four days.<sup>13</sup> However, another study showed that dose  
 229 increase after one week may be needed and showed the benefits of a four week treatment period.<sup>14,32</sup> Moreover,  
 230 we expect that a four week treatment period is needed to show a change in disease-specific health status.

231

232 *Measurements* consist of baseline and outcome-assessment **in CIRO**; diary cards; home visits; phone calls **and**  
 233 **completion of questionnaires** (figure 1).

234

Figure 1. Study design

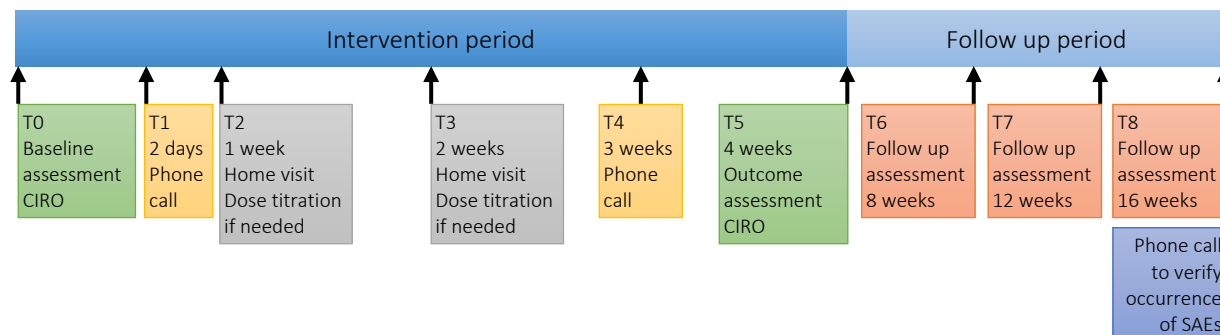

235

236 *Collaboration:* The current project is a collaboration of the Centre of Expertise for Palliative Care of the  
 237 Maastricht UMC+ and CIRO, centre of expertise for patients with chronic organ failure. The project is  
 238 embedded in research school CAPHRI of the Maastricht University.

239

240



## 241 5. Study population

### 242 5.1 Population (base)

243 *Participants* will be outpatients with a confirmed diagnosis of COPD, who suffer from severe dyspnea despite  
 244 optimal pharmacological and non-pharmacological treatment. Participants will be recruited at CIRO, a centre for  
 245 pulmonary rehabilitation in the Netherlands after they completed a pulmonary rehabilitation program **within the**  
 246 **last 2 years. Furthermore, participants will be recruited at the pulmonary rehabilitation program of the**  
 247 **Zuyderland hospital in Heerlen, the Netherlands, and the VieCuri hospital in Venlo, the**  
 248 **Netherlands.** Yearly, about **600 450** patients with COPD are seen at CIRO, **about 85 patients are seen in the**  
 249 **Zuyderland hospital and about 35 patients are seen in the VieCuri hospital.** About **50-83%** of these patients  
 250 report a Modified Medical Research Council Dyspnea Scale (mMRC) score of **2, 3** or **4** before pulmonary  
 251 rehabilitation.<sup>33</sup> After completion of the pulmonary rehabilitation program about **22-51%** of the patients report  
 252 an mMRC score of **2, 3** or **4** points. About **10-25%** of these patients won't be eligible for this study because of a  
 253 recent exacerbation, history of substance misuse, renal failure or because patients are not opioid-naïve. Based on  
 254 **an on-going study among patients with advanced COPD the first 7 months of recruitment** we expect a  
 255 response rate of about **50-30%**. Therefore, it seems reasonable to recruit 124 patients within two years.  
 256 Moreover, a recent study has shown that recruitment and sustained participation of patients with advanced  
 257 COPD in this region is possible.<sup>34</sup>  
 258

### 259 5.2 Inclusion criteria

- 260 • Diagnosis of COPD according to the current Global strategy for the diagnosis, management, and  
 261 prevention of chronic obstructive pulmonary disease (GOLD)<sup>9</sup>;
- 262 • Optimal pharmacological treatment, **including treatment with a combination of a long-acting**  
 263 **muscarinic antagonist and a long-acting  $\beta$ -agonist**<sup>35</sup>;
- 264 • Grade **2, 3** or **4** dyspnea on the mMRC<sup>36</sup>;
- 265 • Optimal non-pharmacological treatment defined as completed a comprehensive pulmonary rehabilitation  
 266 program<sup>37,38</sup>.
- 267

### 268 5.3 Exclusion criteria

- 269 • History of substance misuse;
- 270 • Exacerbation of COPD within two weeks of study enrolment;
- 271 • Waiting list for lung transplantation;
- 272 • Pregnant or childbearing potential not using contraception;
- 273 • Renal failure (creatinine clearance <15mL/min);
- 274 • Age under 18;
- 275 • Not being able to read or fill in the questionnaires or diary;
- 276 • Allergy for morphine or its excipients;
- 277 • Concomitant use of irreversible MAO blockers;
- 278 • Use of opioids;
- 279 • History of convulsions;
- 280 • Head injury;
- 281 • Intestinal obstruction;
- 282 • Gastroparesis;
- 283 • Liver disease.
- 284

### 285 5.4 Sample size calculation

286 A sample size calculation with a level of significance of 5% and power of 90% has shown that 54 patients per  
 287 treatment group are needed in order to detect a clinically relevant change in CAT score of 3.8 points (SD 6.1  
 288 points (CAT-score in patients with mMRC **2, 3** or **4**))<sup>39,40</sup>. In addition, a sample size calculation with a level of  
 289 significance of 5% and power of 90% has shown that 10 patients per treatment group are needed in order to  
 290 detect a change in PtcCO<sub>2</sub> level of 1.0kPa (SD 0.7<sup>33</sup>). We expect a drop-out rate of about 13%.<sup>41</sup> Therefore, 62  
 291 patients will be included per group.  
 292  
 293

294 **6. Treatment of subjects**

295 **6.1 Investigational product/treatment**

296 Patients in the intervention group will receive regular clinical care and morphine SR 10mg, administered twice  
297 daily (20mg/24h), which can be increased after one or two weeks to three times per day 10mg (30mg/24h) in  
298 non-responders. Patients will receive the study drug for four weeks. The control group will receive regular  
299 clinical care and placebo medication.  
300

301 **6.2 Use of co-intervention (if applicable)**

302 Patients can use their usual medication and will be prescribed a laxative (Movicolon) to prevent constipation  
303 and metoclopramide as needed treat possible side-effects.  
304  
305

## 306 7. Investigational product

### 307 7.1 Name and description of investigational product(s)

#### 308 *Investigational product:*

309 Patients will receive morphine SR 10mg (Centrafarm B.V) two to three times daily or placebo. Hard gelatine  
310 capsules of size AA in Swedish orange containing one morphine SR tablet 10 mg per capsule will be produced.  
311 Morphine SR has a marketing authorisation for pain and will be used according to current Dutch and  
312 international guidelines for treatment of dyspnea.<sup>1,5-9</sup>

313

#### 314 *Placebo:*

315 Patients in the control group will receive placebo, consisting of microcrystalline cellulose (FMC BioPolymer).  
316 Hard gelatine capsules of size AA in Swedish orange containing microcrystalline cellulose will be produced.

317

### 318 7.2 Summary of findings from clinical studies

319 The Cochrane review exploring the effectiveness of opioid drugs given by any route in relieving the symptom of  
320 breathlessness in patients receiving palliative treatment included 18 studies.<sup>42</sup> They found a small but  
321 statistically significant positive effect of opioids on breathlessness in the analysis of studies using non-nebulised  
322 opioids. There was no statistically significant positive effect seen for exercise tolerance in either group of  
323 studies or for breathlessness in the studies using nebulised opioids. They concluded that there is evidence to  
324 support the use of oral or parenteral opioids to palliate breathlessness although numbers of patients involved in  
325 the studies were small. No evidence was found to support the use of nebulised opioids. Since the publication of  
326 the Cochrane review, another systematic review and meta-analysis has been performed<sup>12</sup>, which confirmed that  
327 morphine can relieve severe dyspnea in patients with COPD. This review also explored the effect on health-  
328 related quality of life and concluded that a meta-analysis of HRQL could not be performed due to study  
329 heterogeneity and insufficient data.

330

### 331 7.3 Summary of known and potential risks and benefits

332 Known adverse effects from morphine are nausea, vomiting, constipation, dizziness and drowsiness. In the  
333 study from Currow et al.<sup>14</sup> 18% of the patients experienced important adverse effects.

334

335 A few studies explored adverse respiratory effects. (Please see attachment: literature respiratory side-effects)

336 One previous study including 48 patients (42 patients with COPD) showed no change in respiratory rate after  
337 administration of 20 mg oral morphine.<sup>13</sup> Three studies (including 8 patients<sup>43</sup>; including 16 patients<sup>18</sup>; and  
338 including 12 patients<sup>44</sup>) did not show a change in spirometry following administration of opioids. The study  
339 from Poole et al. (n=16) showed no change in oxygen saturation.<sup>18</sup> One study, including 13 patients showed a  
340 change in blood gases.<sup>24</sup> However, in this study a very high morphine dosage was used (0.8mg/kg).

341

342 A recent population-based prospective cohort study showed that lower dose opioids ( $\leq 30$  mg oral morphine  
343 equivalents a day) were not associated with increased mortality, while a higher dose opioids was associated with  
344 increased mortality.<sup>26</sup>

345

### 346 7.4 Description and justification of route of administration and dosage

347 Oral route of administration will be used, according to the Dutch guideline for palliative treatment of dyspnea.<sup>7</sup>  
348 Two previous reviews showed no effect of nebulized administration of morphine.<sup>12,42</sup> Previous studies showed  
349 the effectiveness of orally administered opioids<sup>14,42</sup>, so parenteral administration is not needed.

350

### 351 7.5 Dosages, dosage modifications and method of administration

352 Patients in the intervention group will receive morphine 10mg SR, administered twice daily (20mg/24h). After  
353 one and two weeks the response will be evaluated. If the mean dyspnea NRS score won't be reduced by 1 point  
354 in comparison with baseline<sup>31</sup>, the dosage will be increased until morphine 10mg SR three times daily  
355 (30mg/24h). A recent study showed that improvement may occur during the first week of treatment. Therefore,  
356 dosage increase should not occur within one week.<sup>32</sup> We have chosen a maximum dosage of 30mg/24h because  
357 a recent population-based prospective cohort study showed that lower dose opioids ( $\leq 30$  mg oral morphine  
358 equivalents a day) were not associated with increased mortality, while a higher dose opioids was associated with  
359 increased mortality.<sup>26</sup>

360

**361 7.6 Preparation and labelling of Investigational Medicinal Product**

362 Preparation and labelling of the investigational medicinal products will be done according to the guideline Good  
363 Manufacturing Practice (2003/94/EG, via [http://ec.europa.eu/health/files/eudralex/vol-4/2009\\_06\\_annex13.pdf](http://ec.europa.eu/health/files/eudralex/vol-4/2009_06_annex13.pdf))

364

365 For the label text we refer to section D3.

366

**367 7.7 Drug accountability**

368 The investigational products will be delivered by Basic Pharma Manufacturing and will be stored at the  
369 pharmacy of the Maastricht UMC+. The patient will receive the investigational product from the researcher. At  
370 the end-of-the study the investigational product that is not used will be returned to the pharmacy and will be  
371 destroyed.

372

373

## 374 **8. Non-investigational product**

### 375 **8.1 Name and description of non-investigational product(s)**

376 *Movicolon:*

377 Patients will receive a prescription for one sachet Movicolon (13.8g) a day at the start of the study. Movicolon is  
378 a powder for oral solution, containing macrogol. Movicolon has a marketing authorisation for constipation.

379

380 *Metoclopramide:*

381 Patients will receive a prescription for metoclopramide 10mg tablets as needed. Metoclopramide has a  
382 marketing authorisation for nausea.

383

### 384 **8.2 Description and justification of route of administration and dosage**

385 Oral route of administration will be used for Movicolon and metoclopramide.

386

### 387 **8.3 Dosages, dosage modifications and method of administration**

388 Patients will start with one sachet Movicolon a day. The need for dosage adjustment will be assessed after 2  
389 days, 1, 2 and 3 weeks by the researcher. Patients can always contact the researcher or physician on call at CIRO  
390 between these appointments with questions about management of side effects. If a patient has constipation or  
391 diarrhoea the researcher will contact one of the palliative care physicians in the project team. The palliative care  
392 physician will advise to reduce the dosage stepwise to once every two or three days in case of diarrhoea or to  
393 increase stepwise to two or a maximum of three sachets a day in case of constipation.

394

395 Patients will receive a prescription for metoclopramide and will be instructed to start with metoclopramide if  
396 they experience nausea in a dosage of 3 times a day 1 tablet of 10mg. The need for metoclopramide will be  
397 assessed after 2 days, 1, 2 and 3 weeks by the researcher. Patients can always contact the researcher or physician  
398 on call at CIRO between these appointments with questions about management of side effects.

399

### 400 **8.4 Drug accountability**

401 The patient will receive a prescription for Movicolon and Metoclopramide. The patient's own pharmacy will  
402 deliver the medication.

403

404

## 405 9. Methods

### 406 9.1 Study parameters/endpoints

#### 407 9.1.1 Main study parameter/endpoint

- 408 • Change in disease-specific health-related quality of life (COPD Assessment Test (CAT)<sup>39,45</sup>);
- 409 • Change in respiratory parameters: arterial blood gas (partial pressure of carbon dioxide (pCO<sub>2</sub>); partial
- 410 pressure of oxygen (pO<sub>2</sub>); respiratory rate; pulse oximetric saturation (SpO<sub>2</sub>); transcutaneous carbon dioxide
- 411 (PtcCO<sub>2</sub>); Overnight oximetry; lung function.

#### 412 9.1.2 Secondary study parameters/endpoints

- 413 • Change in exercise capacity (6 minute walking distance (6MWD)<sup>46</sup>);
- 414 • Change in functional capacity (care dependency (Care Dependency Scale, CDS<sup>47</sup>) and mobility (Timed ‘Up
- 415 & Go’ (TUG) test<sup>48</sup>);
- 416 • Sensory and affective dimensions of dyspnea (Multidimensional Dyspnea Profile (MDP))<sup>49</sup>;
- 417 • Impact of dyspnea (modified Pulmonary Functional Status and Dyspnea Questionnaire, PFSDQ-M)<sup>50,51</sup>;
- 418 • Dyspnea (Numeric Rating Scale (NRS)<sup>31</sup>);
- 419 • Adverse effects (including nausea, vomiting, constipation, drowsiness (Epworth Sleep Questionnaire<sup>52</sup>),
- 420 cognition (Montreal Cognitive Assessment, MoCA<sup>53</sup>);
- 421 • Compliance;
- 422 • Exacerbations (defined as an acute event characterized by a worsening of the patient’s respiratory symptoms
- 423 that is beyond normal day-to-day variations and leads to a change in medication<sup>9</sup>);
- 424 • Costs and cost-effectiveness.

#### 425 9.1.3 Other study parameters

- 426 • Demographic characteristics;
- 427 • Comorbidities;
- 428 • Smoking status;
- 429 • Use of long-term oxygen therapy (LTOT);
- 430 • Use of non-invasive positive pressure ventilation (NIV).
- 431

### 432 9.2 Randomisation, blinding and treatment allocation

433 After providing **verbal** informed consent **during a phone call**, patients will be randomized using ALEA

434 randomization. Minimisation will be used to guarantee equal distribution between intervention and control

435 group. No stratification will be done. Members of the research team who perform measurements will be blinded

436 for treatment allocation.

437

438 To allow safety interim analyses, in case of an exacerbation resulting in hospital admission or death during the

439 study period treatment allocation (group 1 or 2) will be checked. The researcher won’t know which of the two

440 groups is the intervention group.

441

### 442 9.3 Study procedures

443 Measurements at baseline will be performed at CIRO and include: demographics; medical history; medication;

444 co-morbidities; LTOT; NIV; 6 minute walking distance (6MWD)<sup>46</sup>; lung function; inspiratory capacity-to-total

445 lung capacity ratio (IC/TLC); creatinine clearance; arterial blood gas; respiratory rate; pulse oximetric saturation

446 (SpO<sub>2</sub>); transcutaneous carbon dioxide (PtcCO<sub>2</sub>); generic health-related quality of life (EuroQol-5 Dimensions,

447 EQ-5D-5L); disease-specific health-related quality of life (COPD Assessment Test (CAT)<sup>39,45</sup>); severity of

448 dyspnea (NRS)<sup>31</sup>); sensory and affective dimensions of dyspnea (Multidimensional Dyspnea Profile (MDP))<sup>49</sup>;

449 and impact of dyspnea (mMRC and modified Pulmonary Functional Status and Dyspnea Questionnaire,

450 PFSDQ-M)<sup>50,51</sup>; cognition (MoCA)<sup>53</sup>; Epworth Sleepiness Questionnaire; care dependency (Care Dependency

451 Scale, CDS<sup>47</sup>) and mobility (Timed ‘Up & Go’ (TUG) test<sup>48</sup>). Overnight oximetry will be performed in the

452 home environment at baseline.

453 A member of the research team will visit patients after 1 and 2 weeks in their home environment to assess:

454 CAT; TUG test; respiratory rate at rest; SpO<sub>2</sub>; PtcCO<sub>2</sub>; **and changes in use of medication.**

455 A member of the research team will call the patient after 2 days and 3 weeks to assess adverse effects (including  
 456 but not limited to nausea, constipation, and drowsiness); compliance; and exacerbations (defined as an acute  
 457 event characterized by a worsening of the patient's respiratory symptoms that is beyond normal day-to-day  
 458 variations and leads to a change in medication<sup>9</sup>).

459 After 4 weeks the following measurements will be performed at CIRO: **change in use of medication; use of**  
 460 **LTOT and NIV**; lung function; IC/TLC ratio; arterial blood gas; respiratory rate; SpO<sub>2</sub>; PtcCO<sub>2</sub>; 6MWD; EQ-  
 461 5D-5L; CAT; MDP; PFSDQ-M; CDS; TUG test; adverse effects (including MoCA and Epworth Sleepiness  
 462 Questionnaire) and general well-being. Subsequently, overnight oximetry will be performed in the home  
 463 environment.

464 **Finally, the patients will be sent the CAT, EQ-5D-5L and NRS four and twelve weeks after the end of the**  
 465 **intervention. One of their informal caregivers will be asked to fill out the cost diary and an overview of**  
 466 **their medication use, including morphine, at that moment and in the preceding four weeks four. These**  
 467 **will be sent four, eight and twelve weeks after the end of the intervention. After the final questionnaire**  
 468 **has returned, the patient will be called to check the occurrence of SAEs.**

469 All measurements are summarized in table 1.

470

471 All participants will receive a patient card, listing the research they are participating in along with contact details  
 472 for investigator and the doctor on call at CIRO in order to alert them in the event of an emergency.

473

474 *Table 1. Measurements*

| Measurement                      | T0 | T1 | T2 | T3 | T4 | T5 | T6 | T7 | T8 |
|----------------------------------|----|----|----|----|----|----|----|----|----|
| Demographics                     | X* |    |    |    |    |    |    |    |    |
| Medical history                  | X* |    |    |    |    |    |    |    |    |
| Smoking history                  | X* |    |    |    |    |    |    |    |    |
| Medication                       | X* |    | X  | X  |    | X  | X  | X  | X  |
| Use of LTOT                      | X* |    |    |    |    | X  |    |    |    |
| Use of NIV                       | X* |    |    |    |    | X  |    |    |    |
| 6MWD                             | X* |    |    |    |    | X  |    |    |    |
| Lung function (FEV1, FVC)        | X* |    |    |    |    | X  |    |    |    |
| Measurement IC/TLC ratio         | X  |    |    |    |    | X  |    |    |    |
| Creatinine clearance             | X* |    |    |    |    |    |    |    |    |
| CAT                              | X* |    | X  | X  |    | X  | X  |    | X  |
| CDS                              | X* |    |    |    |    | X  |    |    |    |
| Arterial blood gas               | X  |    |    |    |    | X  |    |    |    |
| Respiratory rate at rest         | X  |    | X  | X  |    | X  |    |    |    |
| SpO <sub>2</sub>                 | X  |    | X  | X  |    | X  |    |    |    |
| PtcCO <sub>2</sub>               | X  |    | X  | X  |    | X  |    |    |    |
| EQ-5D-5L                         | X  |    |    |    |    | X  | X  |    | X  |
| mMRC                             | X* |    |    |    |    | X  |    |    |    |
| MDP                              | X  |    |    |    |    | X  |    |    |    |
| PFSDQ-M                          | X  |    |    |    |    | X  |    |    |    |
| TUG test                         | X  |    | X  | X  |    | X  |    |    |    |
| Dyspnea (NRS)                    | X  | X  | X  | X  | X  | X  | X  |    | X  |
| Cognition (MoCA)                 | X  |    |    |    |    | X  |    |    |    |
| Epworth Sleepiness Questionnaire | X  |    |    |    |    | X  |    |    |    |
| Overnight oximetry (at home)     | X  |    |    |    |    | X  |    |    |    |
| Adverse effects                  | X  | X  | X  | X  | X  | X  | X  |    | X  |
| Compliance                       |    | X  | X  | X  | X  | X  |    |    |    |
| Exacerbations                    |    | X  | X  | X  | X  | X  | X  | X  | X  |
| Healthcare use                   |    | X  | X  | X  | X  | X  | X  | X  | X  |
| Costs diary                      |    | X  | X  | X  | X  | X  | X  | X  | X  |
| Morphine use                     |    |    |    |    |    |    | X  | X  | X  |

475 \* For patients that enter the study immediately after completion of the rehabilitation program, these  
 476 outcomes will be used from the end evaluation of the rehabilitation program, where possible.

477

#### 478 9.4 Withdrawal of individual subjects

479 Subjects can leave the study at any time for any reason if they wish to do so without any consequences. The  
 480 investigator can decide to withdraw a subject from the study for urgent medical reasons.

481       **9.4.1 Specific criteria for withdrawal**

482 Hospital admission because of an exacerbation.

483 Unacceptable adverse effects.

484

485       **9.5 Replacement of individual subjects after withdrawal**

486 Individual subjects will not be replaced after withdrawal.

487

488       **9.6 Follow-up of subjects withdrawn from treatment**

489 After withdrawal and discontinuation of the study drug the general practitioner and the chest physician will be  
490 informed by letter. Patients will receive usual care after withdrawal.

491

492       **9.7 Premature termination of the study**

493 Criteria for termination of the study prematurely:

- 494       • Statistically significant higher proportion of deceased patients in the intervention group;  
495       • Statistically significant higher proportion of hospitalized patients in the intervention group.

496

497 In the case of premature termination of the clinical trial, the investigator will inform the reviewing accredited  
498 METC and the sponsor. Reasons for termination will be stated in writing. All participants will be informed.

499 Participants will receive usual care.

500



## 501 10. Safety reporting

### 502 10.1 Temporary halt for reasons of subject safety

503 In accordance to section 10, subsection 4, of the WMO, the sponsor will suspend the study if there is sufficient  
 504 ground that continuation of the study will jeopardise subject health or safety. The sponsor will notify the  
 505 accredited METC without undue delay of a temporary halt including the reason for such an action. The study  
 506 will be suspended pending a further positive decision by the accredited METC. The investigator will take care  
 507 that all subjects are kept informed.  
 508

### 509 10.2 AEs, SAEs and SUSARs

#### 510 10.2.1 Adverse events (AEs)

511 Adverse events are defined as any undesirable experience occurring to a subject during the study, whether or not  
 512 considered related to the investigational product. All adverse events reported spontaneously by the subject or  
 513 observed by the investigator or his staff will be recorded.

#### 514 10.2.2 Serious adverse events (SAEs)

515 A serious adverse event is any untoward medical occurrence or effect that:

- 516 • results in death;
- 517 • is life threatening (at the time of the event);
- 518 • requires hospitalisation or prolongation of existing inpatients' hospitalisation;
- 519 • results in persistent or significant disability or incapacity;
- 520 • is a congenital anomaly or birth defect; or
- 521 • any other important medical event that did not result in any of the outcomes listed above due to medical or  
 522 surgical intervention but could have been based upon appropriate judgement by the investigator.  
 523

524 The investigator will report all SAEs to the sponsor without undue delay after obtaining knowledge of the  
 525 events.  
 526

527 The sponsor will report the SAEs through the web portal *ToetsingOnline* to the accredited METC that approved  
 528 the protocol, within 7 days of first knowledge for SAEs that result in death or are life threatening followed by a  
 529 period of 8 days to complete the initial preliminary report. All other SAEs will be reported within a period of  
 530 maximum 15 days after the sponsor has first knowledge of the serious adverse events.

#### 531 10.2.3 Suspected unexpected serious adverse reactions (SUSARs)

532 Adverse reactions are all untoward and unintended responses to an investigational product related to any dose  
 533 administered.  
 534

535 Unexpected adverse reactions are SUSARs if the following three conditions are met:

- 536 1. the event must be serious (see chapter 9.2.2);
- 537 2. there must be a certain degree of probability that the event is a harmful and an undesirable reaction to the  
 538 medicinal product under investigation, regardless of the administered dose;
- 539 3. the adverse reaction must be unexpected, that is to say, the nature and severity of the adverse reaction are not  
 540 in agreement with the product information as recorded in:
  - 541 a. Summary of Product Characteristics (SPC) for an authorised medicinal product;
  - 542 b. Investigator's Brochure for an unauthorised medicinal product.  
 543

544 The sponsor will report expedited the following SUSARs through the web portal *ToetsingOnline* to the METC:

- 545 • SUSARs that have arisen in the clinical trial that was assessed by the METC;
- 546 • SUSARs that have arisen in other clinical trials of the same sponsor and with the same medicinal product,  
 547 and that could have consequences for the safety of the subjects involved in the clinical trial that was assessed  
 548 by the METC.

549 The remaining SUSARs are recorded in an overview list (line-listing) that will be submitted once every half  
 550 year to the METC. This line-listing provides an overview of all SUSARs from the study medicine, accompanied  
 551 by a brief report highlighting the main points of concern.

552 The expedited reporting of SUSARs through the web portal Eudravigilance ToetsingOnline is sufficient as  
553 notification to the competent authority.

554

555 The sponsor will report expedited all SUSARs to the competent authorities in other Member States, according to  
556 the requirements of the Member States.

557

558 The expedited reporting will occur not later than 15 days after the sponsor has first knowledge of the adverse  
559 reactions. For fatal or life threatening cases the term will be maximal 7 days for a preliminary report with  
560 another 8 days for completion of the report.

561

### 562 **10.3 Annual safety report**

563 In addition to the expedited reporting of SUSARs, the sponsor will submit, once a year throughout the clinical  
564 trial, a safety report to the accredited METC, competent authority, and competent authorities of the concerned  
565 Member States.

566 This safety report consists of:

567 a list of all suspected (unexpected or expected) serious adverse reactions, along with an aggregated summary  
568 table of all reported serious adverse reactions, ordered by organ system, per study;

569 a report concerning the safety of the subjects, consisting of a complete safety analysis and an evaluation of the  
570 balance between the efficacy and the harmfulness of the medicine under investigation.

571

### 572 **10.4 Follow-up of adverse events**

573 All AEs will be followed until they have abated, or until a stable situation has been reached. Depending on the  
574 event, follow up may require additional tests or medical procedures as indicated, and/or referral to the general  
575 physician or a medical specialist.

576 SAEs need to be reported till end of study within the Netherlands, as defined in the protocol

577

## 578 11. Statistical analysis

### 579 11.1 Primary study parameter(s)

580 Baseline characteristics such as age, sex, FEV<sub>1</sub>, respiratory parameters, comorbidities, smoking status, use of  
581 LTOT, use of NIV, mMRC score, NRS score, 6MWD, CDS, TUG test in seconds and MocA will be compared  
582 between the intervention and control group using descriptive statistics. Chi square tests will be used for  
583 categorical variables. Independent sample T-tests and Mann-Whitney U-tests will be used for continuous  
584 variables, according to the variable distribution.

#### 585 586 *Objective 1.1*

587 Change in disease-specific health-related quality of life (CAT-score) between baseline and four weeks will be  
588 compared between patients in the intervention and the control group. First, mean change in CAT-score will be  
589 compared between the two groups using an independent sample T-test or Mann-Whitney U test, according to the  
590 variable distribution. Afterwards, multivariate analyses for longitudinal data will be performed. A linear mixed  
591 model will be developed including CAT-score at baseline, one, two and four weeks and exploring the effect of  
592 treatment according to trial arm. Analyses will be controlled for baseline level of dyspnea (NRS) and age, while  
593 previous studies have shown that these are predictors of opioids response\*.<sup>27</sup> Analyses will be done using an  
594 intention-to-treat approach. Point measures and measures of variability will be provided.

#### 595 596 *Objective 1.2*

597 Change in respiratory parameters (pCO<sub>2</sub>; pO<sub>2</sub>; respiratory rate; SpO<sub>2</sub>; PtcCO<sub>2</sub>; percentage of the time overnight  
598 with PtcCO<sub>2</sub>† below 90%; FEV<sub>1</sub>) between baseline and four weeks will be compared between patients in the  
599 intervention and the control group. First, mean change in these respiratory parameters will be compared between  
600 the two groups using an independent sample T-test or Mann-Whitney U test, according to the variable  
601 distribution. Afterwards, multivariate analyses for longitudinal data will be performed. If measures of disease  
602 severity differ between groups, these will be included as possible confounders. Analyses will be done using an  
603 intention-to-treat approach. Point measures and measures of variability will be provided.

604  
605 A 13% drop out rate has been taken into account in the sample size calculation for the primary analysis to allow  
606 for missing data. Missing data will be reported and investigated to see whether it is missing at random.  
607 Sensitivity analyses will be performed as appropriate. If the data indicate that the level and type of missingness  
608 suggest that imputation is appropriate, we will use the recommended technique (e.g. multiple imputation) to deal  
609 with missing data.

### 611 11.2 Secondary study parameters

#### 612 *Objective 2.1*

613 Change in 6MWD between baseline and four weeks will be compared between patients in the intervention and  
614 the control group. First, mean change in 6MWD will be compared between the two groups using an independent  
615 sample T-test or Mann-Whitney U test, according to the variable distribution. Afterwards, multivariate analyses  
616 for longitudinal data will be performed. If measures of disease severity differ between groups, these will be  
617 included as possible confounders. Analyses will be done using an intention-to-treat approach. Point measures  
618 and measures of variability will be provided.

#### 619 620 *Objective 2.2*

621 The relationship between response to opioids and severity of dyspnea and descriptors of breathlessness will be  
622 explored using univariate analysis, followed by a binary logistic regression model. Response to opioids will be  
623 included as dependent variable (defined as a decrease in mean dyspnea NRS score by 1 point or more in  
624 comparison with baseline).<sup>31</sup> Descriptors of breathlessness (MDP) will be included as independent variables.  
625 Baseline dyspnea (NRS) and age will be included as possible confounders. Patients who discontinue morphine  
626 during the study because of lack of effect and/or intolerable adverse effects will be analysed as non-responders.

#### 627 628 *Objective 2.3*

629 A trial-based economic evaluation will be performed, based on empirical data obtained in the RCT. The  
630 economic evaluation will be performed from the societal and healthcare perspective, the first including costs  
631 inside and outside the health care sector, and will follow published international guidelines.<sup>54</sup> The time horizon

---

\* Controlling for baseline levels of dyspnea (NRS) and age were not performed, since within an RCT it can be assumed baseline characteristics are equal.

† Since an oximeter was used, overnight SO<sub>2</sub> was measured instead of overnight PtcCO<sub>2</sub>.

632 of the trial-based economic evaluation will be four weeks. The intervention offered in this study is primarily  
 633 expected to affect morbidity. So, health-related quality of life is considered as an important outcome in these  
 634 patients. Therefore, a cost-utility analysis will be performed, with the number of quality adjusted life years  
 635 (QALYs) as the primary outcome measure, based on the EQ-5D-5L.<sup>55</sup> Additionally, a cost-effectiveness  
 636 analysis will be performed in which the primary outcome measure is used as measure of effectiveness. So,  
 637 incremental cost-effectiveness ratios will be expressed as 1) the incremental costs per QALY (societal  
 638 perspective) and the 2) additional patient with a clinically relevant improvement on the CAT (health care  
 639 perspective). The cost analysis will be performed according to Dutch guidelines for cost calculations.<sup>56</sup> Study  
 640 related costs will be excluded. Hospital resource use such as outpatient visits, diagnostic procedures, hospital  
 641 admissions due to exacerbations etc. will be registered by means of Case Report Forms. For costs outside the  
 642 hospital, such as costs of morphine and other medications, visits to the GP, physiotherapist, loss of daily  
 643 activities, and out of pocket costs, patients will be asked to fill out a prospective cost diary for a period of 4  
 644 weeks. Costs will be calculated by multiplying resource use with standard unit prices. Standard sensitivity  
 645 analyses and bootstrap analysis will be performed to investigate the uncertainty surrounding the cost-  
 646 effectiveness ratios. Based on the bootstrap results, cost-effectiveness acceptability curves will be constructed,  
 647 showing for a range of cost-effectiveness threshold values, the probability that morphine (in addition to usual  
 648 care) are cost-effective to placebo (in addition to usual care).

649 **A-Since** a time horizon of 4 weeks (which is considered to be the maximum follow up for the placebo group  
 650 from an ethical perspective) may be insufficient to obtain valid estimates of the cost-effectiveness of the use of  
 651 morphine, **collection of data on costs, health-state and side effects will be prolonged for twelve weeks. Data**  
 652 **on** long term cost and effects will additionally be estimated by means of a decision analytical model with a  
 653 lifelong time horizon.[56] First a structure and working model will be created that will facilitate the necessary  
 654 analyses to be performed throughout the project. Once the structure of the model is established and discussed  
 655 with the project group, four essential types of data will be used as input: probabilities, costs, survival and health  
 656 utilities (QALYs). Model input will be based on the trial results, literature review and expert opinion where  
 657 necessary. The model will probably take the form of a Markov model; however this will be decided upon during  
 658 the study. Estimates of the economic impact will first be made using fixed estimates of probabilities, costs, and  
 659 health outcomes. Probabilistic sensitivity analysis will additionally be performed to address uncertainty.  
 660  
 661

### 662 **11.3 Interim analysis**

663 Monitoring will consist of one site initiation visit, eight interim monitoring visits and one close out visit. Every  
 664 interim monitor visit the proportion of hospitalized patients and deceased patients will be compared between the  
 665 intervention and control group by the principal investigator. So, these interim analyses will be performed eight  
 666 times during the study period of three years. When a patient is hospitalized or a patient dies treatment allocation  
 667 will be checked (group 1 or 2). The researcher won't know whether group 1 or 2 is the intervention or control  
 668 group. Therefore, the proportion of hospitalized and the proportion of deceased patients can be compared  
 669 between two groups. For both analyses, Fisher's Exact Test will be used. The code will be broken in case of a  
 670 statistically significant higher number of hospital admissions or deaths in one group. To prevent inappropriate  
 671 termination of the trial because of an unequal distribution in a small sample size, the level of statistical  
 672 significance will be set at  $p < 0.01$ . Moreover, in the final decision to terminate the trial, the probability that a  
 673 hospital admission or death of a patient is an undesirable reaction to the medicinal product under investigation  
 674 will be taken into account. This will be decided by the researcher and a chest physician in CIRO who is not a  
 675 member of the project team.  
 676  
 677  
 678  
 679

## 680 12. Ethical considerations

### 681 12.1 Regulation statement

682 The study will be conducted according to the principles of the Declaration of Helsinki (64th WMA General  
683 Assembly, Fortaleza, Brazil, October 2013) and in accordance with the Medical Research Involving Human  
684 Subjects Act (WMO).

### 686 12.2 Recruitment and consent

687 Patients who fulfil the inclusion criteria will be informed about the study by their clinician, during the end  
688 evaluation of their rehabilitation program or during a phone call. If patients show interest in the study the patient  
689 information letter will be handed or sent. If patients provide their permission, the researcher will call the patients  
690 after about 7 days to ask for **verbal informed** consent to participate in the study. An appointment will be made  
691 for the baseline assessment at CIRO. At the start of this assessment written informed consent will be obtained.  
692

### 693 12.3 Benefits and risks assessment, group relatedness

694 Participants in both groups will be asked to perform two site visits lasting between 2 and 3 hours; complete  
695 diary cards for four weeks; two home visits of 1 hour each and two phone calls of 0.5 hour each within four  
696 weeks. During these visits they will be asked to complete questionnaires, measurement of lung function and a  
697 Timed 'Up & Go' test. Two arterial blood gases will be drawn, which may lead to a hematoma, which will heal  
698 within a few days. **Furthermore, they will be asked to fill out two times three questionnaires of 0.25 hour**  
699 **within twelve weeks after the intervention has ended. Finally, one of the informal caregivers will be asked**  
700 **to complete a cost diary three times, lasting about 0.25 hour each time.** We expect that the burden from the  
701 study will be acceptable.

702  
703 The positive effect of morphine on dyspnea is well-supported in the current literature.<sup>11,13,14</sup> We expect that the  
704 majority of the patients in the intervention group experience a decrease in dyspnea. Patients may also experience  
705 adverse effects such as nausea, vomiting, constipation, or drowsiness. In the current study, adverse effects as  
706 well as the benefits of morphine will be closely monitored. If the adverse effects exceed the benefit of the study  
707 drug, patients will discontinue the study drug and will be analysed as non-responders. The risks of the current  
708 study are minimized because only a low dosage of morphine will be used. A previous study showed that 30 mg  
709 oral morphine a day is not associated with increased mortality.<sup>26</sup>

710  
711 Patients in the control group will receive placebo, despite the fact they experience severe dyspnea and that  
712 current guidelines<sup>1,5,6</sup>, recommend to prescribe opioids. However, in regular clinical care only 2% of the Dutch  
713 clinically stable outpatients with advanced COPD is using opioids.<sup>4</sup> Moreover, if patients in the control group or  
714 intervention group prefer, they will be prescribed morphine after completion of the study by a palliative care  
715 specialist in collaboration with their general practitioner.  
716

### 717 12.4 Compensation for injury

718 The sponsor/investigator has a liability insurance which is in accordance with article 7, subsection 9 of the  
719 WMO.

720  
721 The sponsor (also) has an insurance which is in accordance with the legal requirements in the Netherlands  
722 (Article 7 WMO and the Measure regarding Compulsory Insurance for Clinical Research in Humans of 23th  
723 June 2003). This insurance provides cover for damage to research subjects through injury or death caused by the  
724 study.

- 725 1. € 450.000,-- (i.e. four hundred and fifty thousand Euro) for death or injury for each subject who participates  
726 in the Research;
- 727 2. € 3.500.000,-- (i.e. three million five hundred thousand Euro) for death or injury for all subjects who  
728 participate in the Research;
- 729 3. € 5.000.000,-- (i.e. five million Euro) for the total damage incurred by the organisation for all damage  
730 disclosed by scientific research for the Sponsor as 'verrichter' in the meaning of said Act in each year of  
731 insurance coverage.

732  
733 The insurance applies to the damage that becomes apparent during the study or within 4 years after the end of  
734 the study.  
735

736 **12.5 Incentives**

737 Patients will receive reimbursement for travel costs (0.19 ct. per kilometre or taxi costs).

738

## 739 **13. Administrative aspects, monitoring and publication**

### 740 **13.1 Handling and storage of data and documents**

741 Data will be handled confidentially and anonymously. Only authorized personnel will have access to these  
742 confidential files. A subject identification code list will be used to trace data to an individual subject. The code  
743 (001, 002 etc.) will not be based on the patient initials and birth-date. The key to the code will be safeguarded by  
744 the investigator. The handling of personal data will comply with the Dutch Personal Data Protection Act (in  
745 Dutch: De Wet Bescherming Persoonsgegevens, Wbp). Data will be saved for 15 years.  
746

### 747 **13.2 Monitoring and Quality Assurance**

748 Monitoring will be performed by the Clinical Trial Center Maastricht. Monitoring will follow the international  
749 ICH-GCP guidelines. Monitoring will consist of: site initiation visit; interim monitoring visits; and close out  
750 visit.  
751

### 752 **13.3 Amendments**

753 A 'substantial amendment' is defined as an amendment to the terms of the METC application, or to the protocol  
754 or any other supporting documentation, that is likely to affect to a significant degree:

- 755 • the safety or physical or mental integrity of the subjects of the trial;
- 756 • the scientific value of the trial;
- 757 • the conduct or management of the trial; or
- 758 • the quality or safety of any intervention used in the trial.

759

760 All substantial amendments will be notified to the METC and to the competent authority.

761

762 Non-substantial amendments will not be notified to the accredited METC and the competent authority, but will  
763 be recorded and filed by the sponsor.

764

### 765 **13.4 Annual progress report**

766 The sponsor/investigator will submit a summary of the progress of the trial to the accredited METC once a year.  
767 Information will be provided on the date of inclusion of the first subject, numbers of subjects included and  
768 numbers of subjects that have completed the trial, serious adverse events/ serious adverse reactions, other  
769 problems, and amendments.  
770

### 771 **13.5 Temporary halt and (prematurely) end of study report**

772 The sponsor will notify the accredited METC and the competent authority of the end of the study within a  
773 period of 90 days. The end of the study is defined as the last patient's last visit.

774

775 The sponsor will notify the METC immediately of a temporary halt of the study, including the reason of such an  
776 action.

777

778 In case the study is ended prematurely, the sponsor will notify the accredited METC and the competent  
779 authority within 15 days, including the reasons for the premature termination.

780

781 Within one year after the end of the study, the investigator/sponsor will submit a final study report with the  
782 results of the study, including any publications/abstracts of the study, to the accredited METC and the  
783 Competent Authority.

784

### 785 **13.6 Public disclosure and publication policy**

786 The investigator will be responsible for the quality of the study performance, and he/she has the right to publish  
787 the results of this study in the appropriate well-accepted scientific journals. All publications will be confirming  
788 the basic principles of the CCMO publication policy ([www.ccmo.nl](http://www.ccmo.nl)). The study will be registered in the trial  
789 register ([www.trialregister.nl](http://www.trialregister.nl))

790

**791 14. Structured risk analysis****792 14.1 Synthesis**

793 Paragraph 13.1 is omitted because morphine SR has a marketing authorisation and will be used according to  
794 current daily practice guidelines.<sup>7</sup> The risks of the current study are minimized because only a low dosage of  
795 morphine will be used. A previous study showed that 30 mg oral morphine a day is not associated with  
796 increased mortality.<sup>26</sup> Moreover, patients with an increased risk of adverse effects will be excluded from the  
797 current study (e.g. renal failure, use of irreversible MAO blockers). To date, there is uncertainty about  
798 respiratory adverse effects in patients with COPD. Nevertheless, available studies don't show evidence for  
799 respiratory adverse effects of low dosages morphine in COPD.<sup>13,18,23</sup> In the current study, respiratory adverse  
800 effects will be monitored closely. Patients may experience adverse effects such as nausea, vomiting,  
801 constipation, or drowsiness. Also these adverse effects as well as the benefits of morphine will be closely  
802 monitored. If the adverse effects exceed the benefit of the study drug, patients will discontinue the study drug  
803 and will be analysed as non-responders.

804



805 **15. References**

- 806 1. Lanken PN, Terry PB, Delisser HM, et al. An official American Thoracic Society clinical policy statement:  
807 palliative care for patients with respiratory diseases and critical illnesses. *American journal of*  
808 *respiratory and critical care medicine*. 2008;177(8):912-927.
- 809 2. Curtis JR. Palliative and end-of-life care for patients with severe COPD. *The European respiratory journal*.  
810 2008;32(3):796-803.
- 811 3. World Health Organisation. WHO Definition of Palliative Care.  
812 <http://www.who.int/cancer/palliative/definition/en/>. Accessed 2018/08/30.
- 813 4. Janssen DJ, Spruit MA, Uszko-Lencer NH, Schols JM, Wouters EF. Symptoms, comorbidities, and health  
814 care in advanced chronic obstructive pulmonary disease or chronic heart failure. *Journal of palliative*  
815 *medicine*. 2011;14(6):735-743.
- 816 5. van Deijck RHPD, van Minnen CA, Vastenburg T. Richtlijn COPD 1.0. *Palliatieve zorg Richtlijnen voor de*  
817 *praktijk*. 2010:137-164.
- 818 6. Mahler DA, Selecky PA, Harrod CG, et al. American College of Chest Physicians consensus statement on  
819 the management of dyspnea in patients with advanced lung or heart disease. *Chest*. 2010;137(3):674-  
820 691.
- 821 7. Baas AAF, Zylicz Z, Hesselmann GM. Palliatieve Richtlijn Dyspnoe en hoesten 2.0 2010.
- 822 8. Long Alliantie Nederland. Richtlijn Palliatieve zorg voor mensen met COPD2011.
- 823 9. Vestbo J, Hurd SS, Agusti AG, et al. Global strategy for the diagnosis, management, and prevention of  
824 chronic obstructive pulmonary disease: GOLD executive summary. *American journal of respiratory*  
825 *and critical care medicine*. 2013;187(4):347-365.
- 826 10. Rocker G, Horton R, Currow D, Goodridge D, Young J, Booth S. Palliation of dyspnoea in advanced COPD:  
827 revisiting a role for opioids. *Thorax*. 2009;64(10):910-915.
- 828 11. Jennings AL, Davies AN, Higgins JP, Broadley K. Opioids for the palliation of breathlessness in terminal  
829 illness. *The Cochrane database of systematic reviews*. 2001(3).
- 830 12. Ekstrom M, Nilsson F, Abernethy AA, Currow DC. Effects of Opioids on Breathlessness and Exercise  
831 Capacity in Chronic Obstructive Pulmonary Disease. A Systematic Review. *Annals of the American*  
832 *Thoracic Society*. 2015;12(7):1079-1092.
- 833 13. Abernethy AP, Currow DC, Frith P, Fazekas BS, McHugh A, Bui C. Randomised, double blind, placebo  
834 controlled crossover trial of sustained release morphine for the management of refractory dyspnoea.  
835 *BMJ (Clinical research ed)*. 2003;327(7414):523-528.
- 836 14. Currow DC, McDonald C, Oaten S, et al. Once-daily opioids for chronic dyspnea: a dose increment and  
837 pharmacovigilance study. *Journal of pain and symptom management*. 2011;42(3):388-399.
- 838 15. Janssen DJ, de Hosson S, Bij de Vaate E, Mooren KJ, Baas AA. Attitudes toward opioids for refractory  
839 dyspnea in COPD among Dutch chest physicians. *Chron Respir Dis*. 2015;12(2):85-92.
- 840 16. Young J, Donahue M, Farquhar M, Simpson C, Rocker G. Using opioids to treat dyspnea in advanced  
841 COPD: attitudes and experiences of family physicians and respiratory therapists. *Can Fam Physician*.  
842 2012;58(7):e401-407.
- 843 17. Rocker G, Young J, Donahue M, Farquhar M, Simpson C. Perspectives of patients, family caregivers and  
844 physicians about the use of opioids for refractory dyspnea in advanced chronic obstructive pulmonary  
845 disease. *CMAJ*. 2012;184(9):E497-504.
- 846 18. Poole PJ, Veale AG, Black PN. The effect of sustained-release morphine on breathlessness and quality of  
847 life in severe chronic obstructive pulmonary disease. *American journal of respiratory and critical care*  
848 *medicine*. 1998;157(6):1877-1880.
- 849 19. Smallwood N, Le B, Currow D, Irving L, Philip J. Management of refractory breathlessness with morphine  
850 in patients with chronic obstructive pulmonary disease. *Internal medicine journal*. 2015;45(9):898-904.
- 851 20. Jensen D, Alshail A, Viola R, Dudgeon DJ, Webb KA, O'Donnell DE. Inhaled fentanyl citrate improves  
852 exercise endurance during high-intensity constant work rate cycle exercise in chronic obstructive  
853 pulmonary disease. *Journal of pain and symptom management*. 2012;43(4):706-719.
- 854 21. Currow DC, Plummer J, Frith P, Abernethy AP. Can we predict which patients with refractory dyspnea will  
855 respond to opioids? *Journal of palliative medicine*. 2007;10(5):1031-1036.
- 856 22. Vargas-Bermudez A, Cardenal F, Porta-Sales J. Opioids for the Management of Dyspnea in Cancer Patients:  
857 Evidence of the Last 15 Years-A Systematic Review. *Journal of pain & palliative care*  
858 *pharmacotherapy*. 2015;29(4):341-352.
- 859 23. Eiser N, Denman WT, West C, Luce P. Oral diamorphine: lack of effect on dyspnoea and exercise tolerance  
860 in the "pink puffer" syndrome. *The European respiratory journal*. 1991;4(8):926-931.

- 861 24. Light RW, Muro JR, Sato R, I., Stansbury DW, Fischer C, E., Brown SE. Effects of oral morphine on  
862 breathlessness and exercise tolerance in patients with chronic obstructive pulmonary disease. *The*  
863 *American review of respiratory disease*. 1989;139(1):126-133.
- 864 25. Horton R, Barber C. Opioid-induced respiratory depression resulting from transdermal fentanyl-  
865 clarithromycin drug interaction in a patient with advanced COPD. *Journal of pain and symptom*  
866 *management*. 2009;37(6):e2-5.
- 867 26. Ekstrom MP, Bornefalk-Hermansson A, Abernethy AP, Currow DC. Safety of benzodiazepines and opioids  
868 in very severe respiratory disease: national prospective study. *BMJ (Clinical research ed)*.  
869 2014;348:g445.
- 870 27. Johnson MJ, Bland JM, Oxberry SG, Abernethy AP, Currow DC. Opioids for chronic refractory  
871 breathlessness: patient predictors of beneficial response. *The European respiratory journal*.  
872 2013;42(3):758-766.
- 873 28. Parshall MB, Schwartzstein RM, Adams L, et al. An official American Thoracic Society statement: update  
874 on the mechanisms, assessment, and management of dyspnea. *American journal of respiratory and*  
875 *critical care medicine*. 2012;185(4):435-452.
- 876 29. Banzett RB, Adams L, O'Donnell CR, Gilman SA, Lansing RW, Schwartzstein RM. Using laboratory  
877 models to test treatment: morphine reduces dyspnea and hypercapnic ventilatory response. *American*  
878 *journal of respiratory and critical care medicine*. 2011;184(8):920-927.
- 879 30. Supinski G, Dimarco A, Bark H, Chapman K, Clary S, Altose M. Effect of codeine on the sensations elicited  
880 by loaded breathing. *The American review of respiratory disease*. 1990;141(6):1516-1521.
- 881 31. Johnson MJ, Bland JM, Oxberry SG, Abernethy AP, Currow DC. Clinically important differences in the  
882 intensity of chronic refractory breathlessness. *Journal of pain and symptom management*.  
883 2013;46(6):957-963.
- 884 32. Currow DC, Quinn S, Greene A, Bull J, Johnson MJ, Abernethy AP. The longitudinal pattern of response  
885 when morphine is used to treat chronic refractory dyspnea. *Journal of palliative medicine*.  
886 2013;16(8):881-886.
- 887 33. Spruit MA, Pennings HJ, Janssen PP, et al. Extra-pulmonary features in COPD patients entering  
888 rehabilitation after stratification for MRC dyspnea grade. *Respiratory medicine*. 2007;101(12):2454-  
889 2463.
- 890 34. Janssen DJ, Spruit MA, Schols JM, et al. Predicting changes in preferences for life-sustaining treatment  
891 among patients with advanced chronic organ failure. *Chest*. 2012;141(5):1251-1259.
- 892 35. Global Initiative for Chronic Obstructive Lung Disease (GOLD). Global Strategy for the Diagnosis,  
893 Management and Prevention of COPD. 2015; <http://www.goldcopd.org/>. Accessed September 18,  
894 2015.
- 895 36. Bestall JC, Paul EA, Garrod R, Garnham R, Jones PW, Wedzicha JA. Usefulness of the Medical Research  
896 Council (MRC) dyspnoea scale as a measure of disability in patients with chronic obstructive  
897 pulmonary disease. *Thorax*. 1999;54(7):581-586.
- 898 37. Nici L, Donner C, Wouters E, et al. American Thoracic Society/European Respiratory Society statement on  
899 pulmonary rehabilitation. *American journal of respiratory and critical care medicine*.  
900 2006;173(12):1390-1413.
- 901 38. Spruit MA, Vanderhoven-Augustin I, Janssen PP, Wouters EFM. Integration of pulmonary rehabilitation in  
902 COPD. *The Lancet*. 2008;371(9606):12-13.
- 903 39. Dodd JW, Hogg L, Nolan J, et al. The COPD assessment test (CAT): response to pulmonary rehabilitation.  
904 A multicentre, prospective study. *Thorax*. 2011;66(5):425-429.
- 905 40. Kon SS, Canavan JL, Jones SE, et al. Minimum clinically important difference for the COPD Assessment  
906 Test: a prospective analysis. *The Lancet Respiratory medicine*. 2014;2(3):195-203.
- 907 41. Oxberry SG, Torgerson DJ, Bland JM, Clark AL, Cleland JG, Johnson MJ. Short-term opioids for  
908 breathlessness in stable chronic heart failure: a randomized controlled trial. *European journal of heart*  
909 *failure*. 2011;13(9):1006-1012.
- 910 42. Jennings A-L, Davies AN, Higgings JPT, Gibbs JSR, Broadley KE. A systematic review of the use of  
911 opioids in the management of dyspnoea. *Thorax*. 2002;57(11):939-944.
- 912 43. Beauford W, Saylor TT, Stansbury DW, Avalos K, Light RW. Effects of nebulized morphine sulfate on the  
913 exercise tolerance of the ventilatory limited COPD patient. *Chest*. 1993;104(1):175-178.
- 914 44. Woodcock AA, Gross ER, Gellert A, Shah S, Johnson M, Geddes DM. Effects of dihydrocodeine, alcohol,  
915 and caffeine on breathlessness and exercise tolerance in patients with chronic obstructive lung disease  
916 and normal blood gases. *The New England journal of medicine*. 1981;305(27):1611-1616.
- 917 45. Jones PW, Harding G, Berry P, Wiklund I, Chen WH, Kline Leidy N. Development and first validation of  
918 the COPD Assessment Test. *The European respiratory journal*. 2009;34(3):648-654.

- 919 46. Spruit MA, Polkey MI, Celli B, et al. Predicting outcomes from 6-minute walk distance in chronic  
920 obstructive pulmonary disease. *J Am Med Dir Assoc.* 2012;13(3):291-297.
- 921 47. Dijkstra A, Tiesinga LJ, Goossen WT, Dassen TW. Further psychometric testing of the Dutch Care  
922 Dependency Scale on two different patient groups. *Int J Nurs Pract.* 2002;8(6):305-314.
- 923 48. Podsiadlo D, Richardson S. The timed "Up & Go": a test of basic functional mobility for frail elderly  
924 persons. *J Am Geriatr Soc.* 1991;39(2):142-148.
- 925 49. Meek PM, Banzett R, Parshall MB, Gracely RH, Schwartzstein RM, Lansing R. Reliability and validity of  
926 the multidimensional dyspnea profile. *Chest.* 2012;141(6):1546-1553.
- 927 50. Lareau SC, Carrieri-Kohlman V, Janson-Bjerklie S, Roos PJ. Development and testing of the Pulmonary  
928 Functional Status and Dyspnea Questionnaire (PFSDQ). *Heart Lung.* 1994;23(3):242-250.
- 929 51. Lareau SC, Meek PM, Roos PJ. Development and testing of the modified version of the pulmonary  
930 functional status and dyspnea questionnaire (PFSDQ-M). *Heart Lung.* 1998;27(3):159-168.
- 931 52. Johns MW. Sleepiness in different situations measured by the Epworth Sleepiness Scale. *Sleep.*  
932 1994;17(8):703-710.
- 933 53. Villeneuve S, Pepin V, Rahayel S, et al. Mild cognitive impairment in moderate to severe COPD: a  
934 preliminary study. *Chest.* 2012;142(6):1516-1523.
- 935 54. Ramsey S, Willke R, Briggs A, et al. Good research practices for cost-effectiveness analysis alongside  
936 clinical trials: the ISPOR RCT-CEA Task Force report. *Value Health.* 2005;8(5):521-533.
- 937 55. Dolan P. Modeling valuations for EuroQol health states. *Med Care.* 1997;35(11):1095-1108.
- 938 56. Hakkaart-van Roijen L, Tan SS, Bouwmans CAM. *Handleiding voor kostenonderzoek - methoden en*  
939 *standaard kostprijzen voor economische evaluaties in de gezondheidszorg.* 2010.
- 940 57. Philips Z, Ginnelly L, Sculpher M, et al. Review of guidelines for good practice in decision-analytic  
941 modelling in health technology assessment. *Health Technol Assess.* 2004;8(36):iii-iv, ix-xi, 1-158.  
942  
943
