# Supplementary material
Source: PubMed Central journal article supplement (PMC7432282)
Supplement: jamainternmed-e203134-s002.pdf [file jamainternmed-e203134-s002.pdf]

## Supplementary Online Content

Verberkt CA, van den Beuken-van Everdingen MHJ, Schols JMGA, Hameleers N, Wouters EFM, Janssen DJA. Effect of sustained-release morphine for refractory breathlessness in chronic obstructive pulmonary disease on health status: a randomized clinical trial. *JAMA Intern Med*. Published online August 17, 2020. doi:10.1001/jamainternmed.2020.3134

**eMethods 1.** Participant eligibility criteria and recruitment

**eMethods 2.** Description of outcome measures

**eTable 1.** Covariance structures

**eTable 2.** Mean difference in CAT score and breathlessness scores per assessment for total study population and subgroup participants with mMRC grade 3-4

**eTable 3.** Dose increase during the study for total study population

**eTable 4.** Participants experiencing adverse effects

**eTable 5.** Numeric rating scores for adverse effects

**eReferences**

This supplementary material has been provided by the authors to give readers additional information about their work.

## **eMethods 1. Participant eligibility criteria and recruitment**

### **Inclusion criteria**

- Diagnosis of COPD according to the current Global strategy for the diagnosis, management, and prevention of chronic obstructive pulmonary disease (GOLD)<sup>1</sup>;
- Optimal pharmacological treatment, including treatment with a combination of a long-acting muscarinic antagonist (LAMA) and a long-acting  $\beta$ -agonist (LABA)<sup>1</sup>;
- Grade 2, 3 or 4 dyspnea on the modified Medical Research Council (mMRC) Scale<sup>2</sup>;
  - This criterion was expanded to moderate breathlessness (mMRC grade 2) to allow enrollment of predefined patient numbers.
- Optimal non-pharmacological treatment defined as completed a comprehensive pulmonary rehabilitation program<sup>3,4</sup>.

### **Exclusion criteria**

- History of substance misuse;
- Exacerbation of COPD within two weeks of study enrolment;
- Waiting list for lung transplantation;
- Pregnant or childbearing potential not using contraception;
- Renal failure (creatinine clearance <15mL/min);
- Age under 18;
- Not being able to read or fill in the questionnaires or diary;
- Allergy for morphine or its excipients;
- Concomitant use of irreversible MAO blockers;
- Use of opioids;
- History of convulsions;
- Head injury;
- Intestinal obstruction;
- Gastroparesis;
- Liver disease.

### **Recruitment locations**

Initially, participants were recruited in CIRO, Horn, The Netherlands, after completion of a PR program.<sup>4</sup> Due to delayed participant enrollment, participants were also recruited in Zuyderland Hospital, Heerlen and VieCuri Hospital, Venlo, The Netherlands after completion of an outpatient PR program.

## **eMethods 2. Description of outcome measures**

### **Description of measures**

#### **Health status**

Health status was determined using the COPD Assessment Test (CAT). The CAT is a short and simple instrument that assesses the impact of COPD on health status.<sup>5,6</sup> The questionnaire consists of eight questions, assessing the symptoms on a scale from 0 to 5. The total score ranges from 0 to 40, with higher scores representing worse health status. The minimal clinically important difference (MCID) for the CAT is 2.0 to 3.0 points.<sup>7</sup> The CAT was completed on paper by the participants at T0, T2, T3, and T5.

#### **Respiratory adverse effects**

The primary respiratory outcome was arterial partial pressure of carbon dioxide (PaCO<sub>2</sub>). PaCO<sub>2</sub> was assessed by arterial blood gas drawn from the radial artery at T0 and T5. Also, arterial partial pressure of oxygen (PaO<sub>2</sub>) and arterial oxygen saturation (SaO<sub>2</sub>) were assessed in the arterial blood. A priori, the project group defined a change of 7.5 mmHg in PaCO<sub>2</sub> as clinically relevant.<sup>8</sup>

Overnight pulse oxygen saturation (SpO<sub>2</sub>) and the time SpO<sub>2</sub> was below 90% during the night was assessed at T0 and T5 using a WristOx2 3150 pulse oximeter (Nonin Medical, Plymouth, USA).

Transcutaneous partial pressure of carbon dioxide (PtcCO<sub>2</sub>) and transcutaneous SpO<sub>2</sub> were assessed at T0, T2, T3, and T5 using a SenTec Digital Monitoring System (SenTec, Therwil, Switzerland) with an earlobe clip. Respiratory rate (RR) was assessed at T0, T2, T3, and T5. Finally, lung function consisted of a flow-volume measurement and a body box measurement at T0 and T5. During the flow-volume measurement, forced expiratory volume in the first second (FEV<sub>1</sub>) and forced vital capacity (FVC) were assessed, of which the Tiffenau index (FEV<sub>1</sub>/FVC) was calculated. During the body box measurement, inspiratory capacity (IC), total lung capacity (TLC) and intra thoracic gas volume (ITGV) were assessed and afterwards the IC/TLC ratio was calculated.

#### **Functional performance**

Functional performance consisted of three tests. The 6-minute walk test (6MWT) is a valid and reliable measure to estimate functional exercise capacity in patients with chronic respiratory diseases.<sup>9</sup> Participants cover as many distance as possible in 6 minutes. The test was performed according to the ERS/ATS guidelines.<sup>9</sup> The MCID for the 6MWT is 30m.<sup>10</sup> The 6MWT was performed at T0 and T5.

General mobility was examined using the Timed 'Up & Go' (TUG) test.<sup>11</sup> This simple test requests patients to stand up from a chair, walk 3 meters in a comfortable pace, turn, walk back and sit down on the chair again. During the test, the time is recorded. Participants performed this test twice<sup>12</sup> and the best time was used for analysis. The TUG test is valid and responsive in patients with COPD with an MCID of 0.9-1.4 sec.<sup>13</sup> The TUG test was performed at T0, T2, T3, and T5.

Care dependency was examined using the Care Dependency Scale (CDS).<sup>14,15</sup> This instrument consists of 15 items regarding basic and instrumental activities of daily living, which are each scored on a 5-point Likert Scale. Higher scores indicate less care dependency. The CDS was completed on paper by the participants at T0 and T5.

#### **Severity of breathlessness**

Severity of breathlessness was assessed using a Numeric Rating Scale (NRS)<sup>16</sup> ranging from 0 to 10, with 0 being not breathless at all and 10 being the worst imaginable breathlessness. The participants completed these items verbally. During all assessments, the mean and worst breathlessness in the last 24 hours was recorded. At baseline, the mean breathlessness in the last week was also determined to estimate if the day of the baseline assessment was an average day of that week. The MCID for the NRS for breathlessness is estimated at 1.0 points.<sup>17</sup>

#### **Other outcomes**

At baseline, the following other outcomes were recorded: demographic characteristics (age, gender, Body Mass Index and marital status), medical history (Charlson Comorbidity Index (CCI)<sup>18</sup> and number of exacerbations and hospital admissions in the previous 12 months<sup>19,20</sup>), smoking history, current smoking behavior, use of medication, use of long-term oxygen therapy (LTOT) and use of non-invasive positive pressure ventilation (NIV). At T1, T2, T3, T4, and T5, data on change in medication use, LTOT and NIV, compliance to study intervention, exacerbations and adverse effects were collected.

The CCI was completed based on the patient report and further discussed with the participant for completeness. Compliance to study intervention was recorded by asking the participant during each assessment if they missed a

capsule since the prior assessment. Furthermore, if study medication was handed in at T5, the remaining capsules were counted. The occurrence of exacerbations<sup>21</sup> was assessed by asking the participant if they experienced a worsening of their COPD since the prior assessment. If so, the symptoms were recorded together with given medication and possible contact with a health care professional or admission to the hospital. Collection of adverse effects included nausea, vomiting and retching, drowsiness, constipation, sleeplessness, sleepiness and cognition. Nausea, vomiting and retching, drowsiness, constipation and sleeplessness were recorded during all assessments using NRS (average burden in last 24 hours). The participants completed these items verbally. At the end of the intervention study, the participants were asked which intervention they assumed to have received.

**eTable 1.** Covariance structures

|                             | <b>Random Intercept</b>   | <b>Random Intercept +<br/>Random Slope</b>                | <b>Unstructured</b>           |
|-----------------------------|---------------------------|-----------------------------------------------------------|-------------------------------|
| CAT                         | Chosen                    | Considered                                                | Considered                    |
| Respiratory rate            | Chosen                    | Not applicable                                            | Considered                    |
| PtcCO <sub>2</sub>          | Considered                | Not applicable                                            | Chosen                        |
| SpO <sub>2</sub>            | Considered                | Not applicable                                            | Chosen                        |
| TUG                         | Considered                | Considered                                                | Chosen                        |
| NRS mean<br>breathlessness  | Considered                | Chosen                                                    | Considered                    |
| NRS worst<br>breathlessness | Chosen for both<br>groups | Considered for total group<br>Not applicable for subgroup | Considered for both<br>groups |

CAT, COPD Assessment Test; NRS, Numeric Rating Scale; PtcCO<sub>2</sub>, transcutaneous partial pressure of carbon dioxide; SpO<sub>2</sub>, pulse oxygen saturation; TUG, Timed 'Up&Go' test.

**eTable 2.** Mean difference in CAT score and breathlessness scores per assessment for total study population and subgroup of participants with mMRC grade 3-4

| Mean difference (95% CI), morphine vs placebo |                     |             |                              |             |
|-----------------------------------------------|---------------------|-------------|------------------------------|-------------|
| Total study population                        |                     |             | Subgroup with mMRC grade 3-4 |             |
|                                               | (n=111)             | P value     | (n=49)                       | P value     |
| <b>CAT</b>                                    |                     |             |                              |             |
| T2                                            | -1.45 (-3.33;0.44)  | 0.13        | -0.34 (-3.16;2.48)           | 0.81        |
| T3                                            | -1.83 (-3.74;0.08)  | 0.06        | -1.82 (-4.67;1.04)           | 0.21        |
| T5                                            | -2.18 (-4.14;-0.22) | <b>0.03</b> | -1.17 (-4.17;1.84)           | 0.44        |
| <b>Mean breathlessness (NRS)</b>              |                     |             |                              |             |
| T2                                            | -0.11 (-0.84;0.62)  | 0.76        | -0.41 (-1.46;0.63)           | 0.43        |
| T3                                            | -0.55 (-1.35;0.26)  | 0.18        | -0.90 (-2.10;0.29)           | 0.14        |
| T5                                            | -0.60 (-1.55;0.35)  | 0.21        | -1.31 (-2.80;0.17)           | 0.08        |
| <b>Worst breathlessness (NRS)</b>             |                     |             |                              |             |
| T2                                            | -0.02 (-0.83;0.80)  | 0.97        | -0.63 (-1.73;0.46)           | 0.26        |
| T3                                            | -0.20 (-1.02;0.62)  | 0.63        | -0.44 (-1.55;0.67)           | 0.43        |
| T5                                            | -0.56 (-1.41;0.28)  | 0.19        | -1.33 (-2.50;-0.16)          | <b>0.03</b> |

CAT, COPD Assessment Test; NRS, Numeric Rating Scale

**eTable 3.** Dose increase during the study for total study population

|                                                     | <b>Morphine group</b><br>(n=54) | <b>Placebo group</b><br>(n=57) | <b>P value</b> |
|-----------------------------------------------------|---------------------------------|--------------------------------|----------------|
| Increase T2, No (%)                                 | 13 (27)                         | 30 (55)                        | 0.001          |
| Increase T3, No (%)                                 | 14 (29)                         | 11 (20)                        | 0.28           |
| Decrease T3, No (%)                                 | 1 (2)                           | 3 (5)                          | 0.38           |
| Number of capsules per day after T2, mean (SD)      | 2.26 (0.44)                     | 2.55 (0.50)                    | 0.002          |
| Number of capsules per day after T3, mean (SD)      | 2.53 (0.50)                     | 2.69 (0.47)                    | 0.10           |
| Final number of capsules per day at T5, mean (SD)   | 2.55 (0.50)                     | 2.73 (0.45)                    | 0.07           |
| Participants using 3 capsules per day at T5, No (%) | 24 (55)                         | 37 (73)                        | 0.07           |

**eTable 4.** Numeric Rating Scores for adverse effects

|                       | Mean difference (95% CI), morphine vs placebo |              |                                 |              |
|-----------------------|-----------------------------------------------|--------------|---------------------------------|--------------|
|                       | <b>Baseline to final assessment</b>           |              | <b>Maximal difference</b>       |              |
|                       | Total study population                        |              | Total study population          |              |
|                       | (n=111)                                       | P value      | (n=111)                         | P value      |
| Nausea                | -0.61 (-1.57;0.35)                            | 0.21         | -0.61 (-1.57;0.35)              | 0.21         |
| Vomiting and retching | -0.27 (-0.69;0.14)                            | 0.20         | -0.43 (-1.01;0.14) <sup>a</sup> | 0.14         |
| Drowsiness            | -0.11 (-.124;1.01)                            | 0.84         | 1.23 (0.16;2.31) <sup>b</sup>   | 0.30         |
| Constipation          | 1.53 (0.44;2.62)                              | <b>0.006</b> | 1.53 (0.44;2.62)                | <b>0.006</b> |
| Sleeplessness         | -0.44 (-1,67;0.80)                            | 0.48         | -0.49 (-1.52;0.55) <sup>b</sup> | 0.36         |

<sup>a</sup> Reached at T1<sup>b</sup> Reached at T2



**eTable 5.** Participants experiencing worsening of adverse effects

|                       | No (%)                |                      |                |
|-----------------------|-----------------------|----------------------|----------------|
|                       | <b>Morphine group</b> | <b>Placebo group</b> | <b>P value</b> |
|                       | (n=54)                | (n=57)               |                |
| Nausea                | 16 (30)               | 13 (23)              | 0.48           |
| Vomiting and retching | 8 (15)                | 10 (18)              | 0.72           |
| Drowsiness            | 27 (50)               | 21 (37)              | 0.29           |
| Constipation          | 25 (46)               | 17 (30)              | 0.16           |
| Sleeplessness         | 16 (30)               | 23 (40)              | 0.34           |

A worsening was defined as  $\geq 2$  points on the NRS score.

## eReferences

1. Global Initiative for Chronic Obstructive Lung Disease (GOLD). Global Strategy for the Diagnosis, Management, and Prevention of Chronic Obstructive Pulmonary Disease (2020 report). 2020. <https://goldcopd.org/>.
2. Bestall JC, Paul EA, Garrod R, Garnham R, Jones PW, Wedzicha JA. Usefulness of the Medical Research Council (MRC) dyspnoea scale as a measure of disability in patients with chronic obstructive pulmonary disease. *Thorax*. 1999;54(7):581-586.
3. Nici L, Donner C, Wouters E, et al. American Thoracic Society/European Respiratory Society statement on pulmonary rehabilitation. *Am J Respir Crit Care Med*. 2006;173(12):1390-1413.
4. Spruit MA, Vanderhoven-Augustin I, Janssen PP, Wouters EFM. Integration of pulmonary rehabilitation in COPD. *The Lancet*. 2008;371(9606):12-13.
5. Dodd JW, Hogg L, Nolan J, et al. The COPD assessment test (CAT): response to pulmonary rehabilitation. A multicentre, prospective study. *Thorax*. 2011;66(5):425-429.
6. Jones PW, Harding G, Berry P, Wiklund I, Chen WH, Kline Leidy N. Development and first validation of the COPD Assessment Test. *Eur Respir J*. 2009;34(3):648-654.
7. Smid DE, Franssen FM, Houben-Wilke S, et al. Responsiveness and MCID Estimates for CAT, CCQ, and HADS in Patients With COPD Undergoing Pulmonary Rehabilitation: A Prospective Analysis. *J Am Med Dir Assoc*. 2017;18(1):53-58.
8. Verberkt CA, van den Beuken-van Everdingen MH, Franssen FM, et al. A randomized controlled trial on the benefits and respiratory adverse effects of morphine for refractory dyspnea in patients with COPD: Protocol of the MORDYC study. *Contemp Clin Trials*. 2016;47:228-234.
9. Holland AE, Spruit MA, Troosters T, et al. An official European Respiratory Society/American Thoracic Society technical standard: field walking tests in chronic respiratory disease. *Eur Respir J*. 2014;44(6):1428-1446.
10. Polkey MI, Spruit MA, Edwards LD, et al. Six-minute-walk test in chronic obstructive pulmonary disease: minimal clinically important difference for death or hospitalization. *Am J Respir Crit Care Med*. 2013;187(4):382-386.
11. Podsiadlo D, Richardson S. The timed "Up & Go": a test of basic functional mobility for frail elderly persons. *J Am Geriatr Soc*. 1991;39(2):142-148.
12. Mesquita R, Janssen DJA, Wouters EFM, Schols JMGA, Pitta F, Spruit MA. Within-day test-retest reliability of the Timed Up & Go test in patients with advanced chronic organ failure. *Arch Phys Med Rehabil*. 2013;94(11):2131-2138.
13. Mesquita R, Wilke S, Smid DE, et al. Measurement properties of the Timed Up & Go test in patients with COPD. *Chron Respir Dis*. 2016.
14. Dijkstra A, Tiesinga LJ, Goossen WT, Dassen TW. Further psychometric testing of the Dutch Care Dependency Scale on two different patient groups. *Int J Nurs Pract*. 2002;8(6):305-314.
15. Dijkstra A, Brown L, Havens B, et al. An international psychometric testing of the care dependency scale. *J Adv Nurs*. 2000;31(4):944-952.
16. Dorman S, Byrne A, Edwards A. Which measurement scales should we use to measure breathlessness in palliative care? A systematic review. *Palliat Med*. 2007;21(3):177-191.
17. Johnson MJ, Bland JM, Oxberry SG, Abernethy AP, Currow DC. Clinically important differences in the intensity of chronic refractory breathlessness. *J Pain Symptom Manage*. 2013;46(6):957-963.
18. Murray CJ, Barber RM, Foreman KJ, et al. Global, regional, and national disability-adjusted life years (DALYs) for 306 diseases and injuries and healthy life expectancy (HALE) for 188 countries, 1990-2013: quantifying the epidemiological transition. *Lancet*. 2015;386(10009):2145-2191.
19. Charlson M, Szatrowski TP, Peterson J, Gold J. Validation of a combined comorbidity index. *J Clin Epidemiol*. 1994;47(11):1245-1251.

20. Charlson ME, Pompei P, Ales KL, MacKenzie CR. A new method of classifying prognostic comorbidity in longitudinal studies: development and validation. *J Chronic Dis.* 1987;40(5):373-383.
21. Vestbo J, Hurd SS, Agusti AG, et al. Global strategy for the diagnosis, management, and prevention of chronic obstructive pulmonary disease: GOLD executive summary. *Am J Respir Crit Care Med.* 2013;187(4):347-365.
