# Supplementary material
Source: PubMed Central journal article supplement (PMC7432282)
Supplement: jamainternmed-e203134-s003.pdf [file jamainternmed-e203134-s003.pdf]

## Data Sharing Statement

Verberkt. Effect of Sustained-Release Morphine for Refractory Breathlessness in COPD on Health Status. *JAMA Intern Med*. Published August 17, 2020. 10.1001/jamainternmed.2020.3134

### Data

**Data available:** No

### Additional Information

**Explanation for why data not available:** Upon reasonable request, de-identified individual participant data underlying the results reported in this article (including data dictionary) will be made available.
